# Supplementary material for: Immunogenicity and Safety of Childhood Combination Vaccines: A Systematic Review and Meta-Analysis
Source: MDPI journal article supplement (doi:10.3390/vaccines10030472), 2022-03-18
Supplement: s1 [file s1]

**Supplementary Table S1.** Antigenic content of some of the DTaP-based combined vaccines

| Vaccine          | Trade name    | Manufacturer    | Antigen contents |   |    |     |     |     | Age                |
|------------------|---------------|-----------------|------------------|---|----|-----|-----|-----|--------------------|
|                  |               |                 | D                | T | aP | HBV | Hib | IPV |                    |
| DTaP-HBV-IPV     | Pediarix      | GlaxoSmithKline | √                | √ | √  | √   | -   | √   | 6 weeks to 6 years |
| DTaP-IPV-Hib     | Pentacel      | Sanofi Pasteur  | √                | √ | √  | -   | √   | √   | 6 weeks to 4 years |
| DTaP-HBV-Hib-IPV | Infanrix hexa | GlaxoSmithKline | √                | √ | √  | √   | √   | √   | 6 weeks to 2 years |

DTaP: Diphtheria, Tetanus, acellular Pertussis; HBV: Hepatitis B Virus; Hib: Haemophilus influenzae type b; IPV: Inactivated Polio Virus.

**Supplementary Table S2.** Antigen composition of DTaP-HBV-IPV-Hib

|                                     | <b>DTaP-HBV-Hib-IPV</b>                                                                                                            |
|-------------------------------------|------------------------------------------------------------------------------------------------------------------------------------|
| Diphtheria toxoid (DT)              | DT (>30 IU) adsorbed on Al(OH) <sub>3</sub>                                                                                        |
| Tetanus toxoid (TT)                 | TT (>40 IU) adsorbed on Al(OH) <sub>3</sub>                                                                                        |
| Pertussis antigens                  | Pertussis toxoid (25µg), filamentous hemagglutinin(25µg), and pertactin(8µg), adsorbed on Al(OH) <sub>3</sub>                      |
| Inactivated poliovirus (IPV)        | IPV type 1 (Mahoney strain, 40 D-antigen unit), type 2 (MEF-1 strain, 8D-antigen unit), type 3 (Saukett strain, 32 D-antigen unit) |
| Haemophilus influenzae type b (Hib) | Hib polysaccharide (polyribosylribitol phosphate, 10 µg) conjugated to tetanus toxoid (~25 µg), adsorbed on Al(PO <sub>4</sub> )   |
| Hepatitis B (HepB)                  | HB surface antigen (10 µg) adsorbed on Al(PO <sub>4</sub> )                                                                        |

Composition for 1 dose (0.5 mL for each vaccine). IU: international unit; Al(OH)<sub>3</sub>: aluminum hydroxide, hydrated; Al(PO<sub>4</sub>): aluminum phosphate
